# Supplementary material
Source: MDPI journal article supplement (https://www.mdpi.com/2072-4292/11/7/885)
Supplement: s1 [file s1]

**Table S1.** Socio-economic indicators for selected regions compared to the national total, 2012

| Variable name (Abbreviation)                                            | National total | North-west  | West        | South       | North       | East        | Urban       | Peri-urban  | Rural       |
|-------------------------------------------------------------------------|----------------|-------------|-------------|-------------|-------------|-------------|-------------|-------------|-------------|
| Population (total)                                                      | 75,600,000     | 27,700,000  | 9,779,502   | 18,000,000  | 10,500,000  | 11,900,000  | 23,700,000  | 27,500,000  | 24,500,000  |
| Population density (average)                                            | 121.3          | 318.5       | 110.4       | 95.1        | 64.9        | 56.5        | 783         | 130         | 48.9        |
| Household size (average)                                                | 3.97           | 3.3         | 3.2         | 3.7         | 3.4         | 5.5         | 3.4         | 3.8         | 4.1         |
| Gross Domestic Product (TL) (total)                                     | 1,570,000,000  | 863,000,000 | 201,000,000 | 267,000,000 | 125,000,000 | 120,000,000 | 781,000,000 | 466,000,000 | 323,000,000 |
| Gross Domestic Product in agriculture (TL) (total)                      | 122,000,000    | 21,900,000  | 23,800,000  | 35,200,000  | 20,200,000  | 21,900,000  | 9,528,937   | 52,800,000  | 59,400,000  |
| Gross Domestic Product in industry and services sectors (TL) (total)    | 1,450,000,000  | 841,000,000 | 177,000,000 | 232,000,000 | 105,000,000 | 98,300,000  | 772,000,000 | 413,000,000 | 263,000,000 |
| Share of GDP in agriculture in total GDP (%) (total)                    | 7.77           | 2.54        | 11.84       | 13.18       | 16.16       | 18.25       | 1.22        | 11.33       | 18.39       |
| Share of GDP in industry and services in total GDP (%) (total)          | 92.36          | 97.45       | 88.06       | 86.89       | 84.00       | 81.92       | 98.85       | 88.63       | 81.42       |
| Employment in industrial and services sectors (total)                   | 18,500,000     | 8,592,000   | 2,553,000   | 3,702,000   | 1,835,000   | 1,951,000   | 7,845,000   | 6,084,000   | 4,599,000   |
| Agricultural employment (total)                                         | 5,794,000      | 1,114,000   | 923,000     | 1,431,000   | 1,232,000   | 1,139,000   | 342,000     | 2,645,000   | 2,807,000   |
| Share of agricultural employment in total employment (%) (total)        | 23.84          | 11.48       | 26.55       | 27.88       | 40.17       | 36.86       | 4.18        | 30.30       | 37.90       |
| Share of industrial-services employment in total employment (%) (total) | 76.15          | 88.52       | 73.45       | 72.12       | 59.83       | 63.14       | 95.82       | 69.70       | 62.10       |
| Regional development index (average)                                    | 0.00001        | 1.14        | 0.66        | 0.16        | -0.15       | -1.05       | 2.25        | 0.25        | -0.37       |
| Restricted areas for development (ha) (total)                           | 2,084,100      | 281,269     | 400,912     | 811,632     | 361,431     | 399,907     | 204,281     | 475,305     | 1,404,514   |
| Available land for development (ha) (total)                             | 63,000,000     | 11,100,000  | 8,108,026   | 15,700,000  | 14,400,000  | 14,700,000  | 4,195,392   | 20,400,000  | 38,500,000  |
| Area of ports (ha) (total)                                              | 2905.5         | 875.7       | 447.5       | 420.4       | 1130.1      | 32          | 1533.1      | 910.6       | 461.8       |
| Area of airports (ha) (total)                                           | 29435.9        | 8431.4      | 5863        | 5579.8      | 2587.4      | 6974.5      | 5974        | 12908.9     | 10553       |
